# Supplementary material
Source: publisher figshare collection journal article supplement (https://osapublishing.figshare.com/ndownloader/files/28331145)
Supplement: Supplementary file 1 [file 28331145]

## Influence of temperature and plasma parameters on the properties of PEALD HfO<sub>2</sub>: supplement

MARGARITA LAPTEVA,<sup>1,2,5</sup> VIVEK BELADIYA,<sup>1,2,5</sup> SEBASTIAN RIESE,<sup>3</sup> PHILLIP HANKE,<sup>3</sup> FELIX OTTO,<sup>4</sup>  TORSTEN FRITZ,<sup>4</sup>  PAUL SCHMITT,<sup>1,2</sup>  OLAF STENZEL,<sup>2</sup> ANDREAS TÜNNERMANN,<sup>1,2</sup> AND ADRIANA SZEGHALMI<sup>1,2,\*</sup> 

<sup>1</sup>*Institute of Applied Physics, Friedrich Schiller University Jena, Albert-Einstein-Str. 15, 07745 Jena, Germany*

<sup>2</sup>*Fraunhofer Institute for Applied Optics and Precision Engineering, Albert-Einstein-Str. 7, 07745 Jena, Germany*

<sup>3</sup>*Layertec GmbH, Ernst-Abbe-Weg 1, 99441 Mellingen, Germany*

<sup>4</sup>*Institute of Solid State Physics, Friedrich Schiller University Jena, Helmholtzweg 5, 07743 Jena, Germany*

<sup>5</sup>*These authors contributed equally to this work*

\**adriana.szeghalmi@iof.fraunhofer.de*

---

This supplement published with The Optical Society on 7 June 2021 by The Authors under the terms of the [Creative Commons Attribution 4.0 License](#) in the format provided by the authors and unedited. Further distribution of this work must maintain attribution to the author(s) and the published article's title, journal citation, and DOI.

Supplement DOI: <https://doi.org/10.6084/m9.figshare.14561616>

Parent Article DOI: <https://doi.org/10.1364/OME.422156>

# Influence of Temperature and Plasma Parameters on the Properties of PEALD HfO<sub>2</sub>: supplemental document

MARGARITA LAPTEVA,<sup>1,2,#</sup> VIVEK BELADIYA,<sup>1,2,#</sup> SEBASTIAN RIESE,<sup>3</sup>  
PHILLIP HANKE,<sup>3</sup> FELIX OTTO,<sup>4</sup> TORSTEN FRITZ,<sup>4</sup> PAUL SCHMITT,<sup>1,2</sup> OLAF  
STENZEL,<sup>2</sup> ANDREAS TÜNNERMANN,<sup>1,2</sup> AND ADRIANA SZEGHALMI,<sup>1,2\*</sup>

<sup>1</sup>Institute of Applied Physics, Friedrich Schiller University Jena, Albert-Einstein-Str. 15, 07745 Jena, Germany

<sup>2</sup>Fraunhofer Institute for Applied Optics and Precision Engineering, Albert-Einstein-Str. 7, 07745 Jena, Germany

<sup>3</sup>Layertec GmbH, Ernst-Abbe-Weg 1, 99441 Mellingen, Germany

<sup>4</sup>Institute of Solid State Physics, Friedrich Schiller University Jena, Helmholtzweg 5, 07743 Jena, Germany

# These authors contributed equally to this work.

\* [adriana.szeghalmi@iof.fraunhofer.de](mailto:adriana.szeghalmi@iof.fraunhofer.de)

The thickness and refractive index non-uniformity (NU) of a HfO<sub>2</sub> thin film deposited on a 76 mm Si (100) wafer at 100°C using 80 sccm Ar flow is shown in Fig. S1a, b. The gradient in the thickness is evident as the lower thickness is seen closer to the precursor inlet. The NU in thickness and refractive index is 3.1% and 0.15%, respectively. Figure S1c, d shows thickness and refractive index non-uniformity (NU) of a HfO<sub>2</sub> thin film deposited on a 200 mm Si (100) wafer at 100°C using 160 sccm Ar flow. Due to better distribution of Ar into the reactor, the NU improved to 2.6% on the larger area.

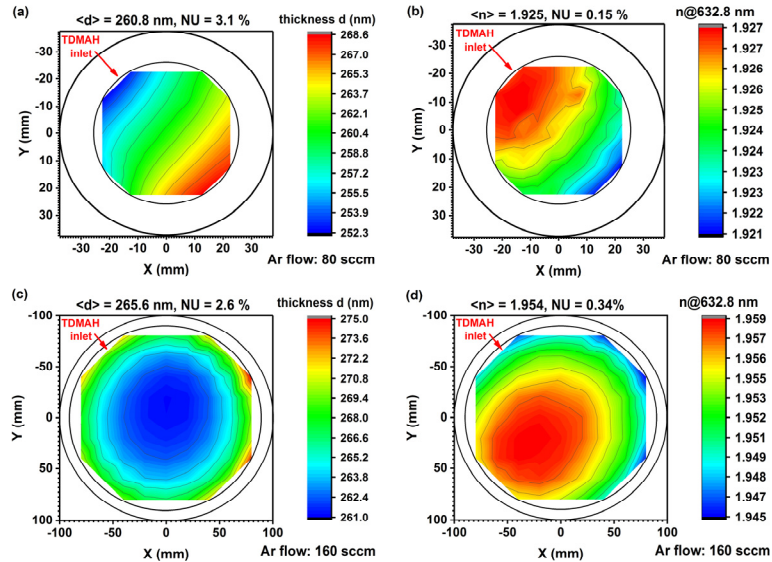

Fig. S1. Thickness and refractive index mapping by spectroscopic ellipsometry of HfO<sub>2</sub> films (ALD sequence: 3.12 s/5s/5s/5s) deposited at 100 °C a) thickness distribution on a 76 mm diameter Si (100) wafer (Ar flow 80 sccm) b) refractive index (at 632.8 nm) distribution on a 76 mm diameter Si (100) wafer (Ar flow 80 sccm), c) thickness distribution on a 200 mm diameter Si (100) wafer (Ar flow 160 sccm), d) refractive index (at 632.8 nm) distribution on a 200 mm diameter Si (100) wafer (Ar flow 160 sccm).

The optical constants of HfO<sub>2</sub> films deposited at 100°C on c-Si substrates were determined using the Tauc-Lorentz dispersion model. The measured and fitted ellipsometry data is shown in Fig S2 a,b. The fit quality was determined from the mean square error (MSE). The MSE values is calculated from least square difference between the measured (m) and calculated (th) curves using the equation mentioned below. The fitting was repeated until the lowest MSE value was achieved. A good agreement is realized between the measured and fit spectra. The MSE values of all HfO<sub>2</sub> thin films were less than 2.

$$Least\ squares\ (LSQ) = \frac{1}{N} \sqrt{\sum_{i=1}^N \{(\Psi_i^m - \Psi_i^{th})^2 + (\Delta_i^m - \Delta_i^{th})^2\}}$$

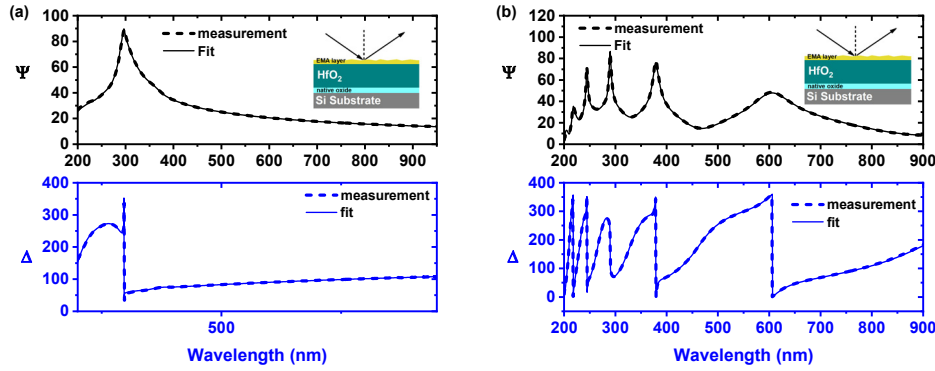

Fig. S2. Measured and fitted spectra of psi ( $\Psi$ ) and delta ( $\Delta$ ) obtained from ellipsometry measurement of HfO<sub>2</sub> thin films deposited at 100°C on c-Si substrate. The thickness (d) and mean square error (MSE) are given for HfO<sub>2</sub> a) d = 35 nm, MSE = 0.5 and b) d = 272 nm, MSE = 1.2. A Tauc-Lorentz dispersion model (see inset image) with 3-oscillators was used to fit the data. The measurement and fitting were performed in the wavelength range from 200 - 980 nm. There is a good agreement between the measured and fitted curves using 3-oscillators. The ALD sequence was 3.12/5/3/5.

The optical constant of HfO<sub>2</sub> films deposited on fused silica substrates were determined from transmittance and reflectance measurement. The spectra were fitted using Lorentz oscillator model in LCalc software. A good fit was achieved by using 7-9 oscillators. The model consists of fused silica substrate, HfO<sub>2</sub> thin film, roughness layer consisting of 50% air and 50% HfO<sub>2</sub> and air. Fig S3 shows good agreement between measured and fit spectra (using 8 oscillators) of HfO<sub>2</sub> film deposited at 100°C using 3.12/5/3/5 ALD sequence. The calculated thickness from this method was 272 nm, which is similar to the thickness obtained from ellipsometry measurement (Fig S2 b).

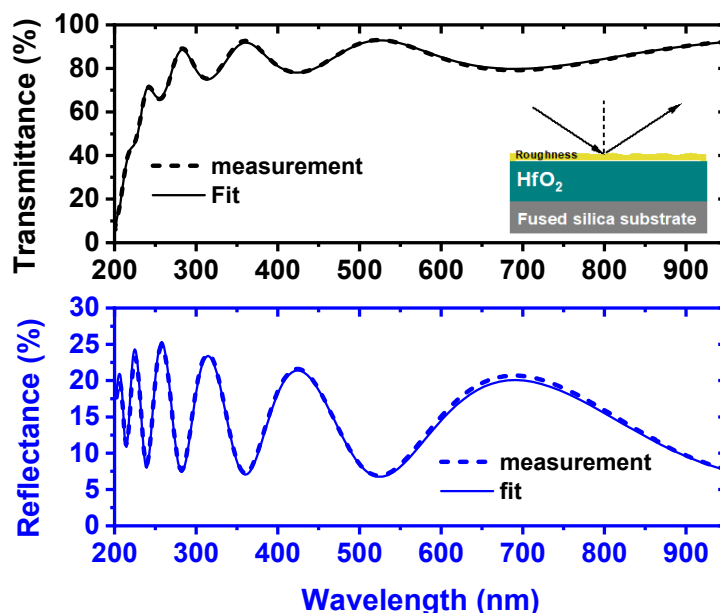

Fig. S3. Measured and fitted spectra of transmittance and reflectance obtained from spectrophotometry measurement of HfO<sub>2</sub> thin films deposited at 100°C on fused silica substrate. The thickness of the film was 272 nm. A Lorentz oscillator model (see inset image) with 8 oscillators was used to fit these data. The ALD sequence was 3.12/5/3/5.

### Influence of the plasma parameters

The variation in surface morphology for different plasma conditions is shown in Fig. S4 a-d, where the surface of HfO<sub>2</sub> films deposited using 3s plasma pulse (S4 a) and 20 sccm O<sub>2</sub> gas flow (S4 b) appears to be smooth. The HfO<sub>2</sub> film deposited using 7 s plasma pulse shows a slightly rougher surface compare to 3 s plasma pulse. It may be due to the onset of crystallization due to more prolonged exposure of plasma species (oxygen radicals and ions). The HfO<sub>2</sub> thin film deposited using 500 W ICP power shows larger grain sizes (Fig. S4 c). The high ICP power increases ion flux at the surface, thereby induces crystallization of the film. Increased surface roughness is observed by AFM (see Fig. S5) in correlation to the SEM images. The change in film morphology is also reflected in the XRD diffractogram shown in Fig S6.

The effect of different plasma conditions on the surface morphology of HfO<sub>2</sub> films is also visible in AFM images shown in Fig S5 a-d. The surface roughness for the films deposited using 3s plasma pulse (Fig. S5 a), 20 sccm O<sub>2</sub> flow rate (Fig. S5 b), and 7 s plasma pulse (Fig. S6 d). However, a significant increase in roughness is seen in Fig 5c for the HfO<sub>2</sub> films deposited using 500 W power, indicating crystallization.

The HO<sub>2</sub> films deposited using 3 s plasma pulse (S6 a), and 20 sccm oxygen flow (S6 b) show broad feature around ~32° 2θ indicating amorphous films. Whereas HfO<sub>2</sub> film deposited using 500 W ICP power shows two peaks between 32.5° and 35° (Fig. S6 c). It indicates the transformation of HfO<sub>2</sub> film from amorphous to polycrystalline on increasing ICP power from 100 W to 500 W. A small and broad feature is seen around 35° (Fig S6 d) for HfO<sub>2</sub> deposited using 7 s of plasma pulse, indicating the onset of crystallization.

The residual OH groups in the films deposited at different plasma conditions are visible in Fig. S7. The high amount of OH incorporation is visible for HfO<sub>2</sub> films deposited using 3 s of plasma pulse and low oxygen flow rate. The lowest incorporation of OH groups is observed for

HfO<sub>2</sub> films deposited using high plasma power. It may be attributed to an increase in density and crystallization at high ICP power.

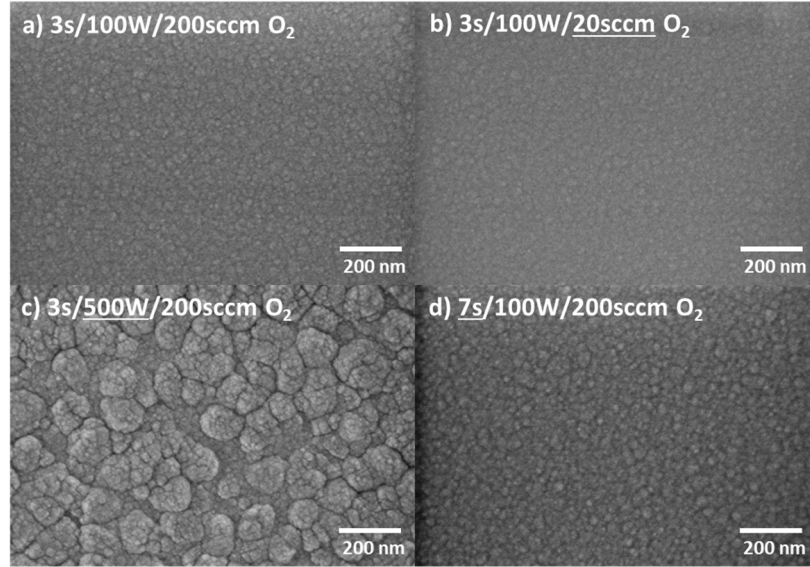

Fig. S4. SEM images of HfO<sub>2</sub> deposited at 100°C and different plasma configurations a) 3s plasma pulse time, 100 W ICP power, 200 sccm O<sub>2</sub> flow b) 3s plasma pulse time, 100 W ICP power, 20 sccm O<sub>2</sub> flow c) 3s plasma pulse time, 500 W ICP power, 200 sccm O<sub>2</sub> flow and d) 7s plasma pulse time, 100 W ICP power, 200 sccm O<sub>2</sub> flow.

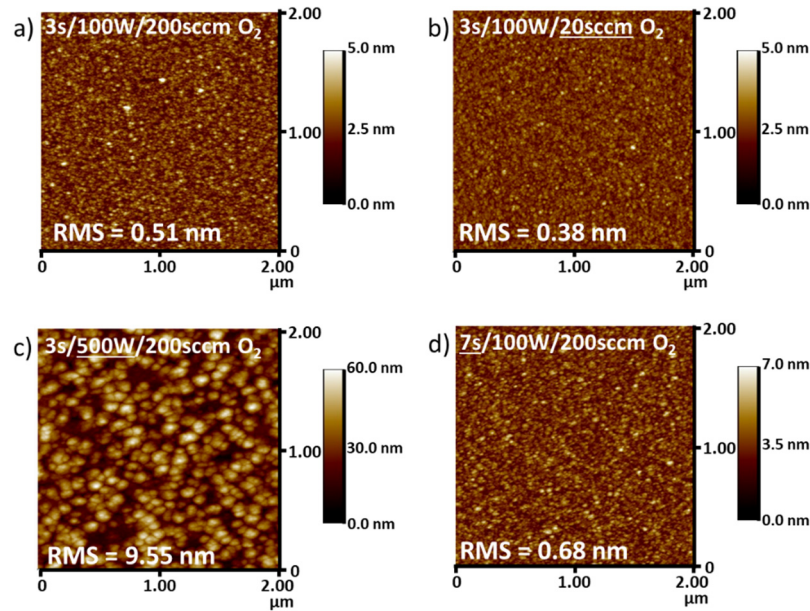

Fig. S5. AFM images of HfO<sub>2</sub> thin films deposited using different plasma conditions a) using an initial condition with 3 s plasma pulse, 200 sccm O<sub>2</sub> gas flow, 100 W ICP power b) 3 s plasma pulse, 20 sccm O<sub>2</sub> gas flow, 100 W ICP power c) 3 s plasma pulse, 200 sccm O<sub>2</sub> gas flow, 500 W ICP power d) 7 s plasma pulse, 200 sccm O<sub>2</sub> gas flow, 100 W ICP power.

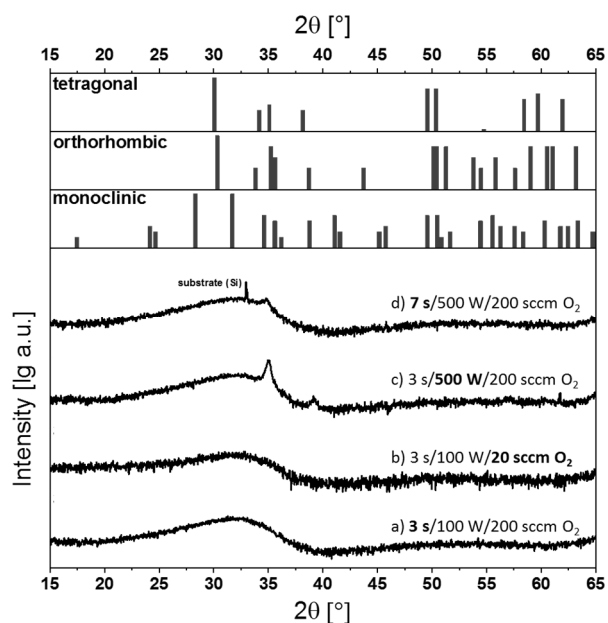

Fig. S6. XRD diffractogram of HfO<sub>2</sub> films deposited at different plasma configurations a) 3s plasma pulse time, 100 W ICP power, 200 sccm O<sub>2</sub> flow b) 3s plasma pulse time, 100 W ICP power, 20 sccm O<sub>2</sub> flow c) 3s plasma pulse time, 500 W ICP power, 200 sccm O<sub>2</sub> flow and d) 7s plasma pulse time, 100 W ICP power, 200 sccm O<sub>2</sub> flow. The peak positions corresponding to tetragonal, orthorhombic, and monoclinic phases are shown at the top as a reference. The peak positions corresponding to tetragonal (ICDD: PDF card No. 08-0342), orthorhombic (ICDD: PDF card No. 21-0904) and monoclinic (ICDD: PDF card No. 43-1017) phase are given as reference.

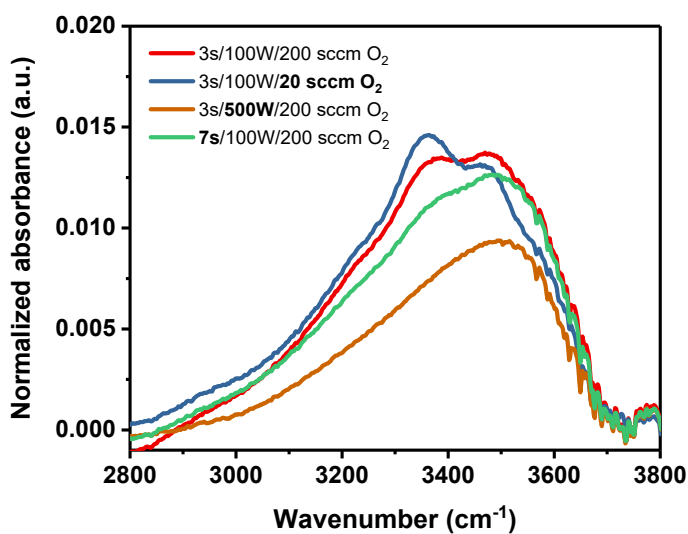

Fig. S7. The FTIR spectra in the wavenumber range corresponding to -OH groups for the films deposited with different plasma conditions.
